# Supplementary material
Source: PubMed Central journal article supplement (PMC6310856)
Supplement: pnas.1803347115.sapp.pdf [file pnas.1803347115.sapp.pdf]

1  
2  
3  
4  
5  
6  
7  
8  
9  
10  
11  
12  
13  
14  
15  
16

**Supplementary Information for:**

**Molecular basis for the acid initiated uncoating of human  
enterovirus D68**

Yue Liu, Ju Sheng, Arno L. W. van Vliet, Geeta Buda,  
Frank J. M. van Kuppeveld, and Michael G. Rossmann

**Corresponding author: Michael G. Rossmann, e-mail: [mr@purdue.edu](mailto:mr@purdue.edu)**

**This Supplementary Information PDF includes:**

**Figures S1 – S17**

**Tables S1 – S11**

17 **Supplementary Figures and Figure Legends**

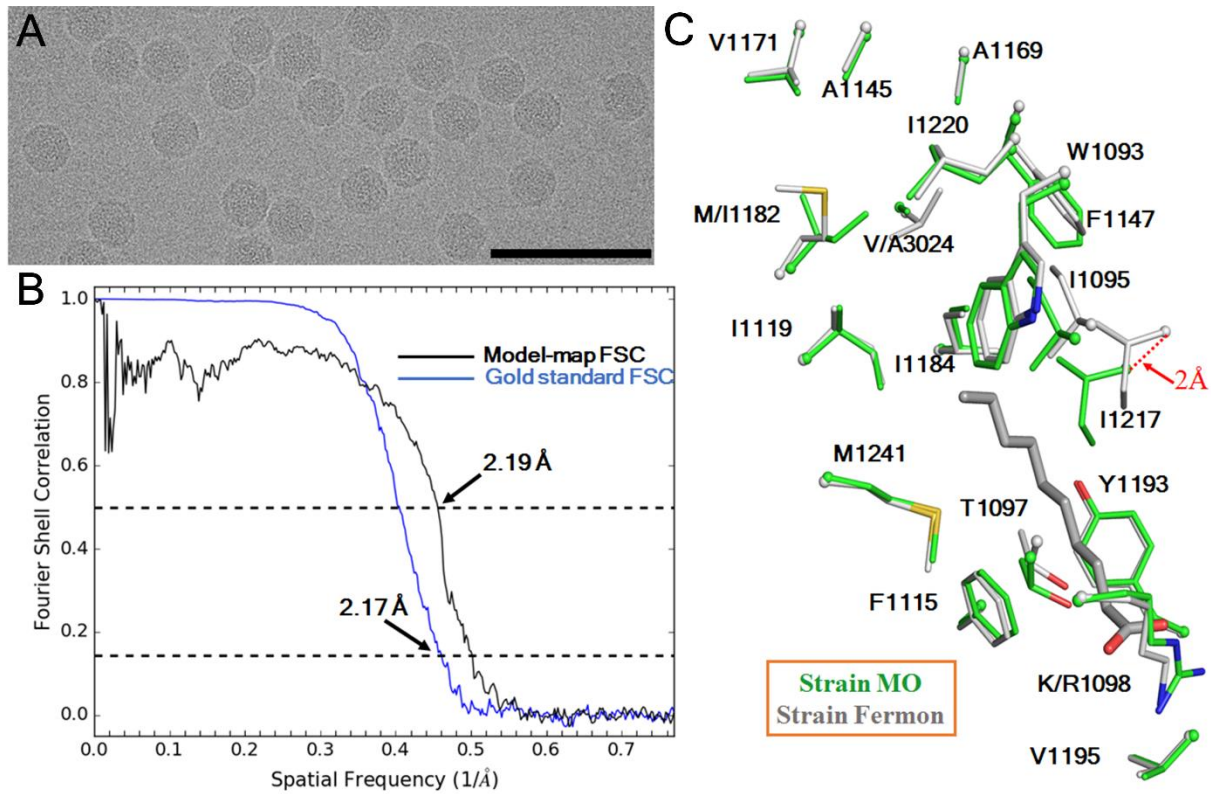

18

19 **Fig. S1.** The cryo-EM structure of EV-D68 strain MO. (A) A typical portion of an electron  
 20 micrograph of strain MO. This micrograph was collected at a defocus of 1.3  $\mu\text{m}$ . Scale bar: 100  
 21 nm. (B) Estimation of map resolution based on Fourier shell correlation (FSC) curves. Gold  
 22 standard FSC refers to the FSC between two independently reconstructed half maps using an  
 23 FSC cutoff of 0.143 (69,70). Model-map FSC refers to the FSC between the final cryo-EM map  
 24 and a map calculated based on the atomic model using an FSC cutoff of 0.5 (69). (C) A close-up  
 25 view of residues lining the VP1 hydrophobic pockets in strain MO (green) and in strain Fermon  
 26 (grey). A pocket factor (grey) is present in strain Fermon but is absent in strain MO. In the  
 27 pocket, these two strains differ mainly in two hydrophobic residues at positions 1182 and 3024.  
 28 Among 469 EV-D68 strains for which the nearly complete genome sequences are available, the  
 29 occurrences of Met and Ile at position 1182 are 58% and 42%, respectively. The occurrences of  
 30 Ala and Val at position 3024 are 52% and 48%, respectively.

31

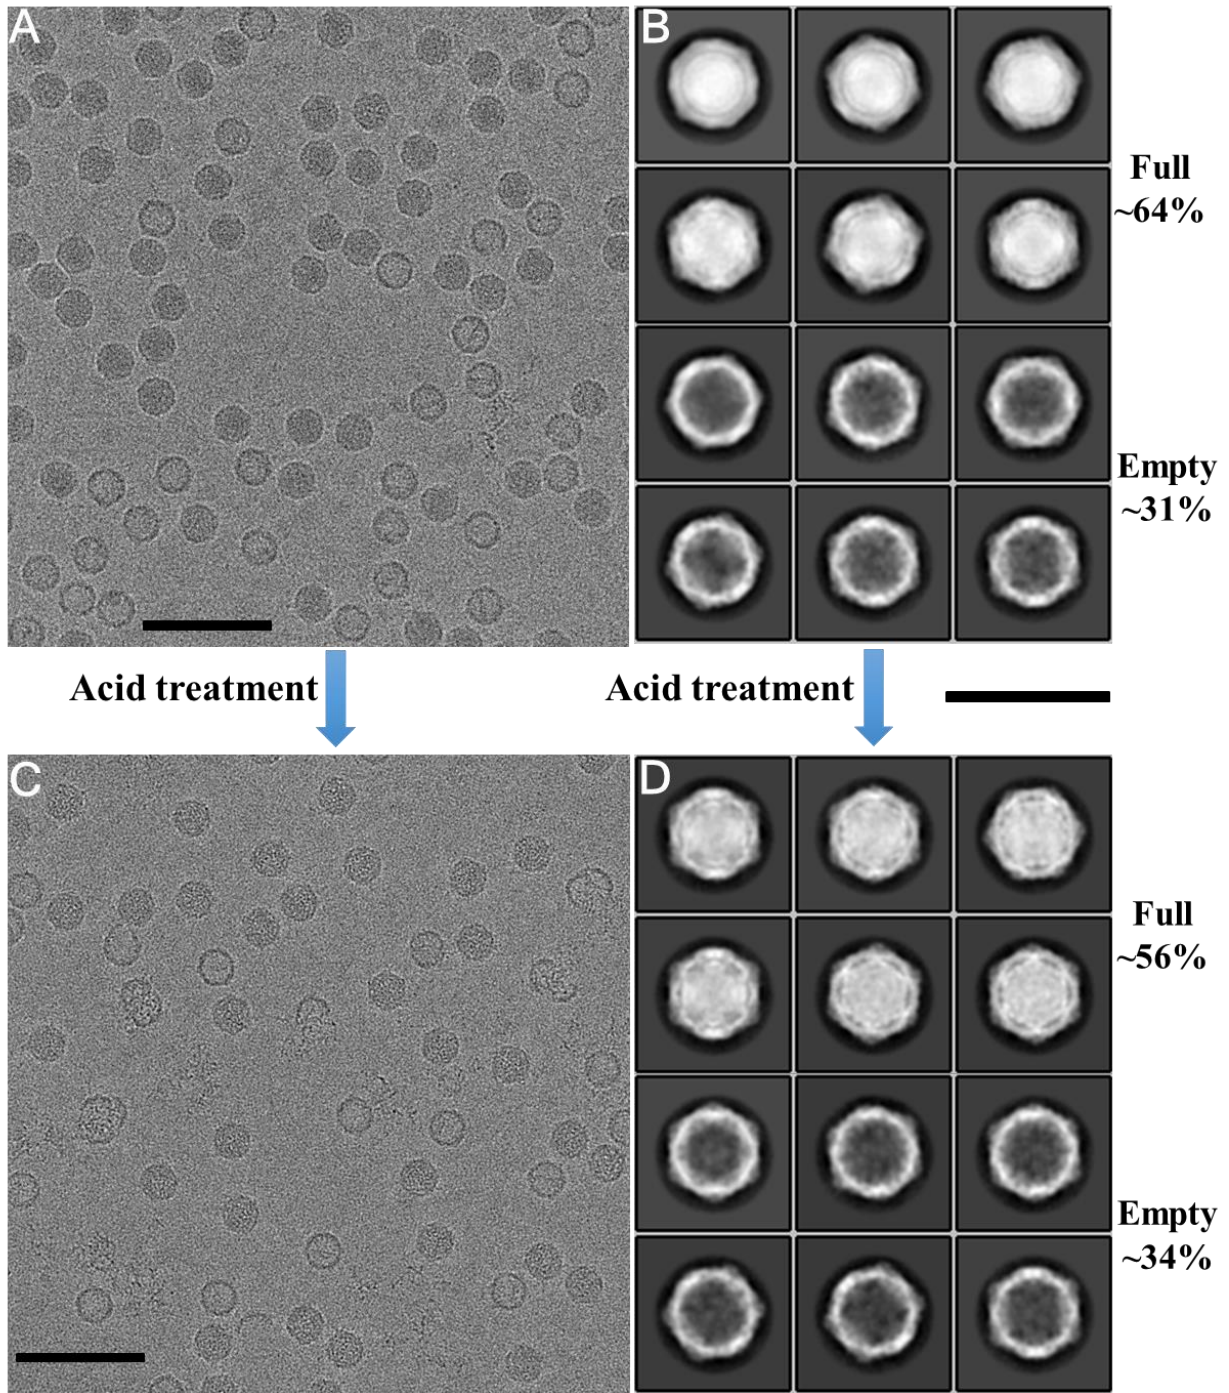

32

33 **Fig. S2.** Acid induces structural alterations of EV-D68 strain MO. Typical electron micrographs  
 34 show EV-D68 particles that were treated with either a pH 7.2 buffer (A) or a pH 5.5 buffer (C) at  
 35 room temperature for 20 min. Scale bar: 100 nm. The corresponding 2D class averages of  
 36 particle images are shown in (B) and (D), respectively. The percentage of full or empty particles  
 37 among all particles is given on the right side. The scale bar for (B) and (D) represents 50 nm.

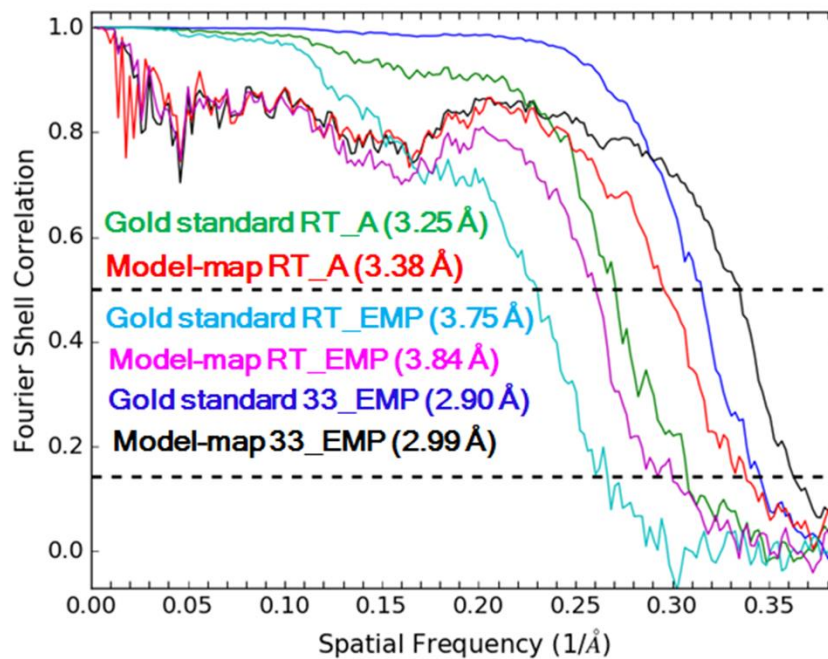

38  
 39  
 40 **Fig. S3.** Assessment of map resolutions based on FSC curves. RT\_A and RT\_EMP refer to A-  
 41 particles and emptied particles in dataset B\_RT\_Acid. 33\_EMP refers to emptied particles in  
 42 dataset B\_33\_Acid. The FSC curves are defined as in **Fig. S1**.  
 43



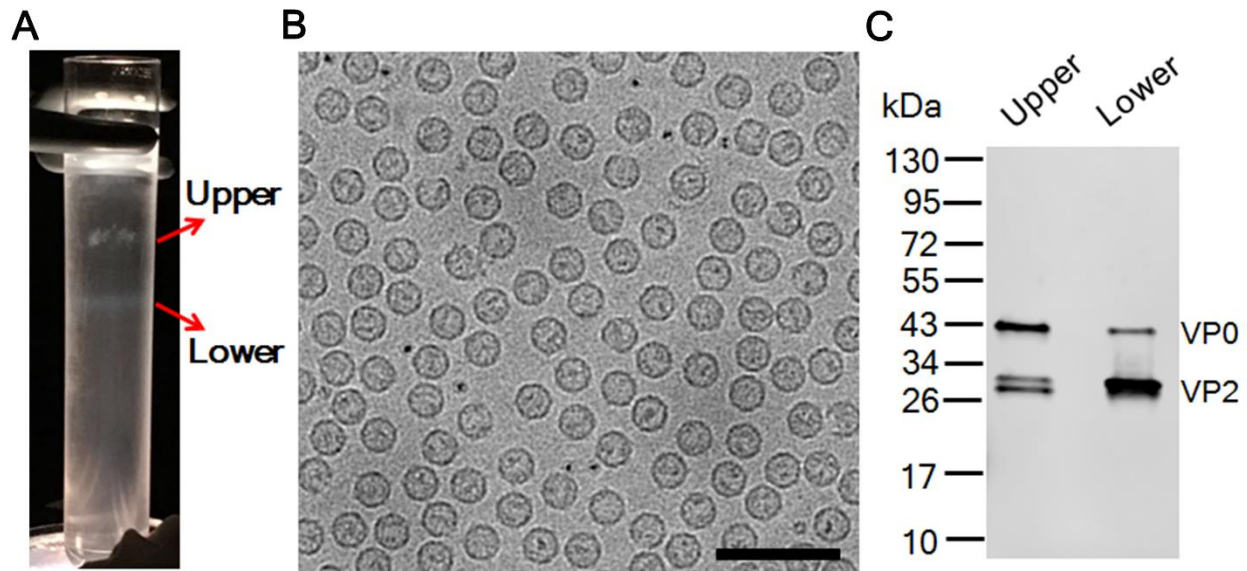

44  
 45 **Fig. S4.** Purification and characterization of EV-D68 particles. (A) Rate zonal ultracentrifugation  
 46 using a 10%-51% (v/v) iodixanol gradient yields two fractions that contain particles of EV-D68  
 47 strain MO. (B) A typical cryo-EM micrograph shows that the upper fraction consists of nearly  
 48 exclusively empty particles. The lower fraction contains a large portion of full particles and is  
 49 referred to as Prep B as in **Fig. S8**. Scale bar: 100 nm. (C) Both fractions were probed for  
 50 VP0/VP2 content using Western blotting. A rabbit polyclonal anti-EV-D68 VP2 antibody  
 51 (1:2000, GeneTex) and an IRDye 800CW goat anti-rabbit antibody (1:10000, LI-COR  
 52 Biosciences) were used as primary and secondary antibodies, respectively. The upper fraction  
 53 contains procapsids that possess VP0. For the lower fraction, the intensity of the VP2 band is  
 54 about eight times as strong as that of the VP0 band. Since the ratio between full and empty  
 55 particles in Prep B is about 1.9:1, VP0-containing procapsids account for only a small portion of  
 56 empty particles in PrepB, whereas VP2-containing emptied particles represent a large portion of  
 57 empty particles. This is in agreement with 3D classification results shown in **Fig. S8**.  
 58

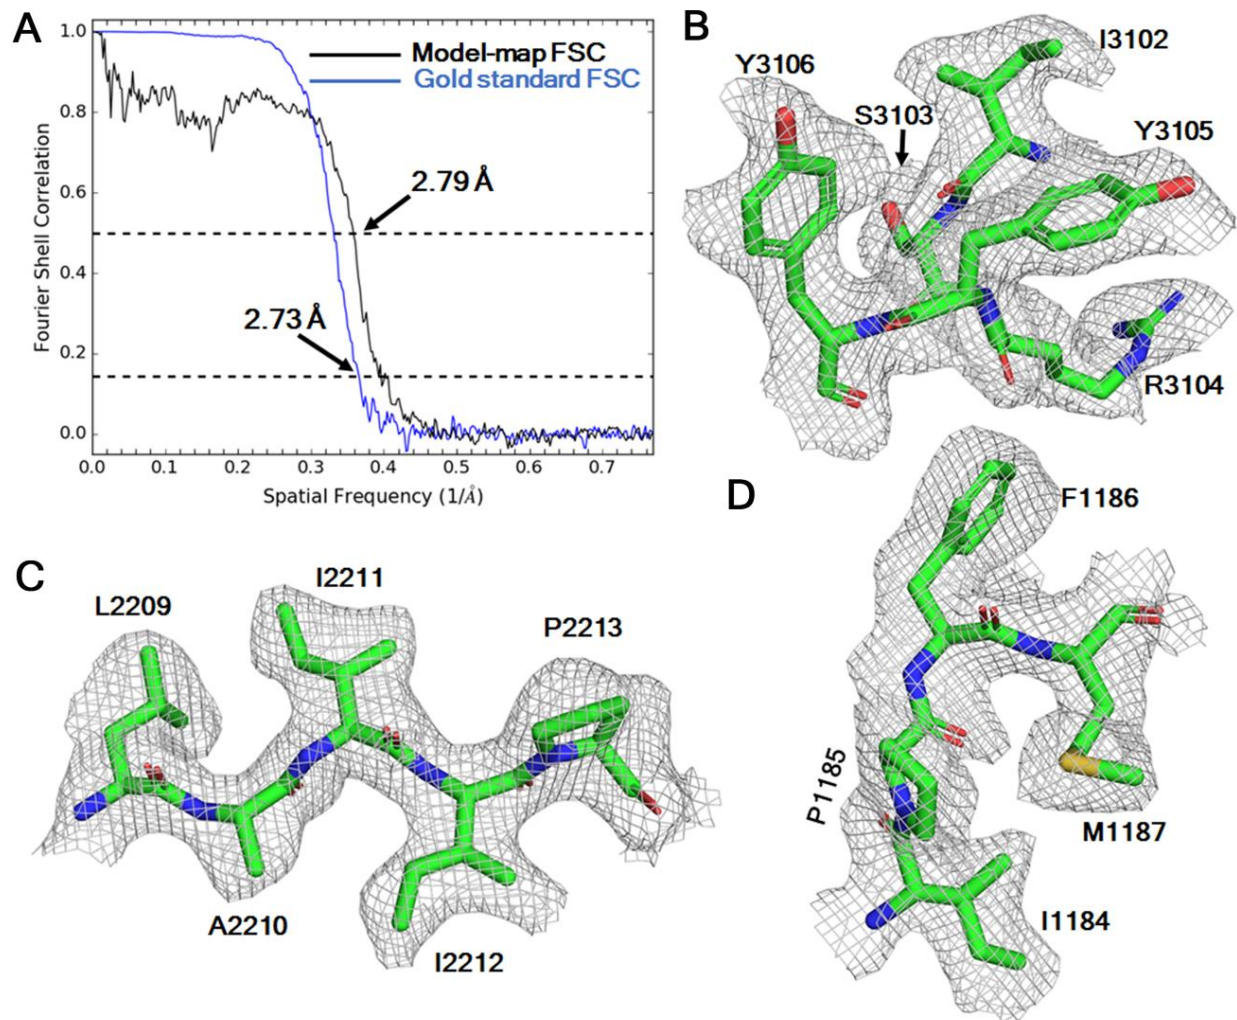

59

60 **Fig. S5.** The 2.7 Å resolution structure of A-particles. (A) The resolution of the cryo-EM map  
 61 was estimated based on FSC curves, defined as in **Fig. S1**. (B-D) Typical densities of the cryo-  
 62 EM map with the fitted atomic model.

63

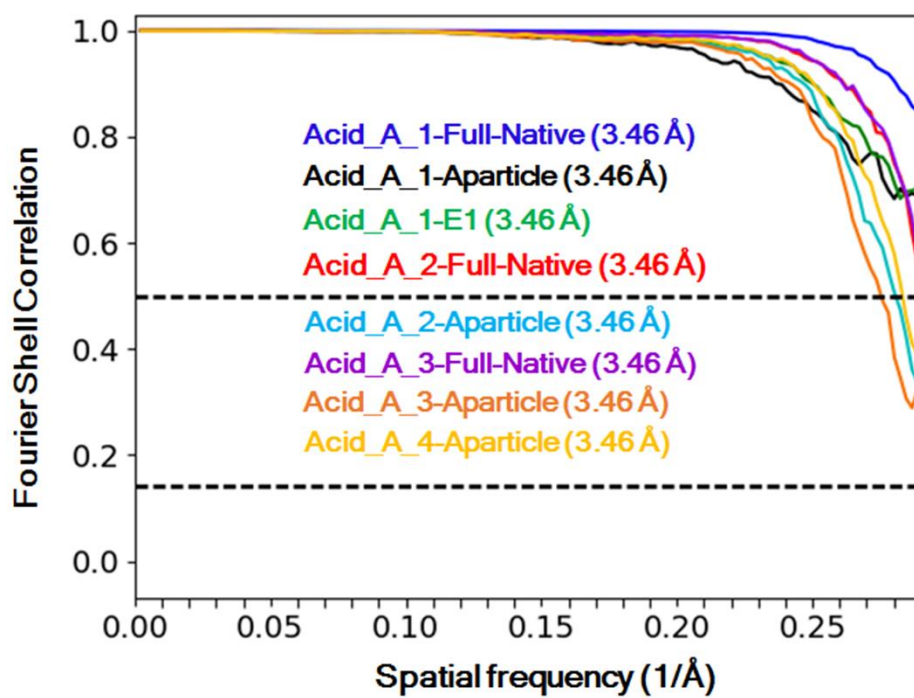

64

65 **Fig. S6.** Assessment of map resolutions for datasets Acid\_A\_1, Acid\_A\_2, Acid\_A\_3, and

66 Acid\_A\_4 based on FSC curves. The FSC curves are defined as in **Fig. S1**.

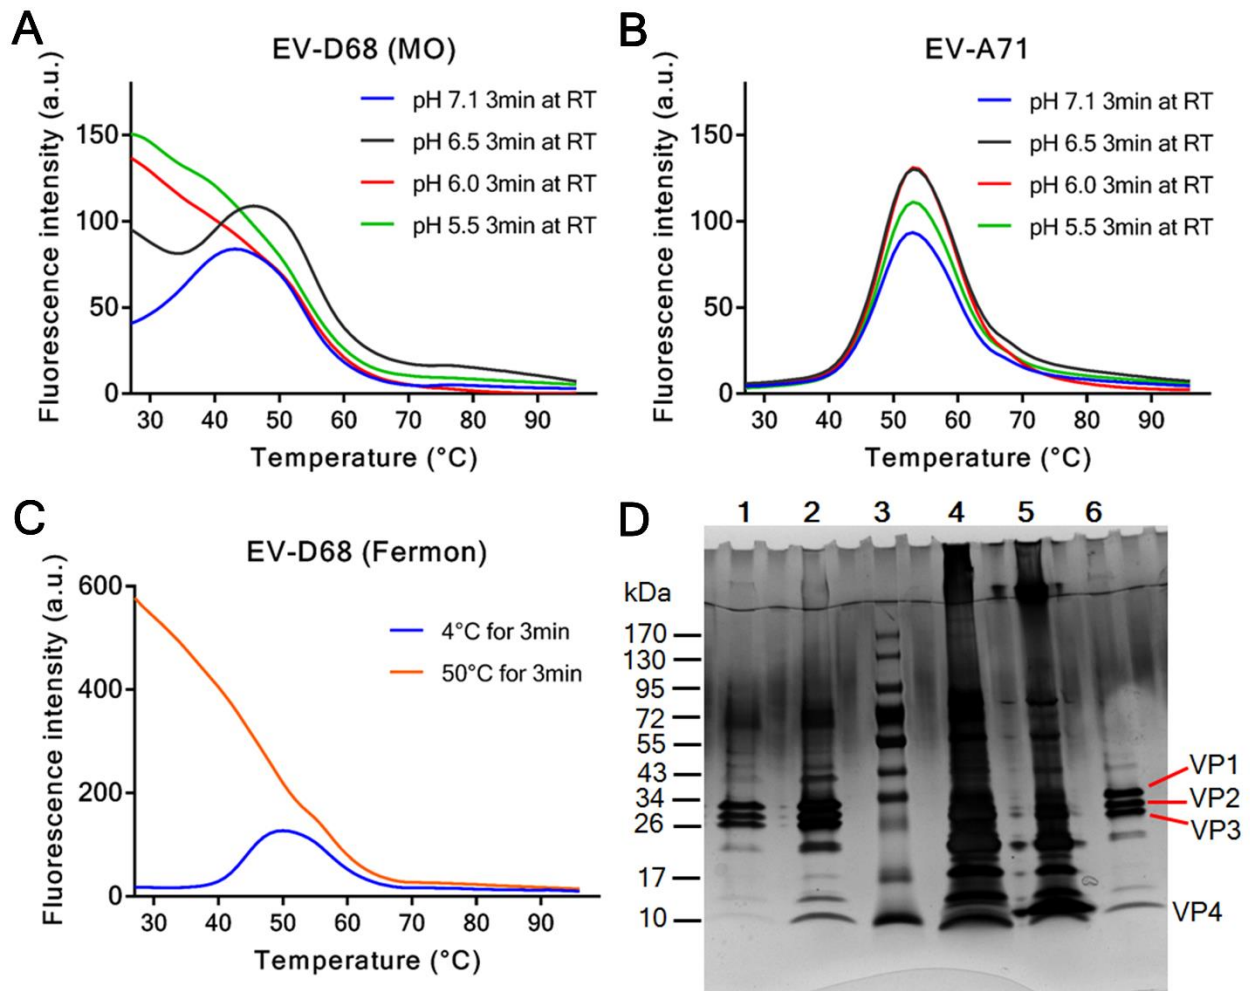

67

68 **Fig S7.** Acid induced structural changes facilitate EV-D68 uncoating. (A-C) The exposure of  
 69 genomic RNA upon increase of temperature was monitored by RNA-binding Sybr Green II dye.  
 70 The mean fluorescence intensity of triplicate measurements is plotted as a function of  
 71 temperature. Samples were treated under indicated conditions before being quenched and used  
 72 for thermostability assays. (A) Upon acid treatments, the genomic RNA of EV-D68 strain MO  
 73 becomes more exposed at low temperatures. The curve for pH 6.5 shows a two-stage transition  
 74 of RNA exposure, which is not apparent under lower pH conditions. This is in agreement with a  
 75 partial conversion of full native virions to A-particles at pH 6.5 shown by cryo-EM analyses. At  
 76 low temperatures, the porous structure of A-particles confers accessibility of genomic RNA to  
 77 dye molecules. The genome becomes fully exposed at a high temperature due in large part to  
 78 heat triggered uncoating of full native virions. (B) The thermal stability of acid resistant EV-A71  
 79 remains nearly unchanged when varying pH condition. (C) Heating of EV-D68 strain Fermon



80 results in A-particles and probably also RNA release from a portion of virions. The temperature  
81 at which genomic RNA is exposed, Tr (**Materials and Methods**), for strains MO and Fermon is  
82 about 37°C and 45°C, respectively. (**D**) SDS-PAGE analysis employing a 4–20% Mini-  
83 PROTEAN TGX gel (silver stained, Bio-Rad). Lane 1: acid treated EV-D68 strain MO. Prep A  
84 was treated with a pH 5.5 buffer for 20 min at RT and neutralized back using a sufficiently  
85 excessive amount of buffer 1 (100mM Na<sub>2</sub>HPO<sub>4</sub> and 50mM citric acid, pH 7.6). The resultant  
86 sample was subjected to buffer exchange into buffer 1 using an Amicon Ultra centrifugal filter  
87 (100 kDa molecular weight cutoff). This enabled removal of VP4 molecules that are not  
88 associated with viral particles. Lane 2: control Prep A (without acid treatment) that was  
89 concentrated using the same type of centrifugal filter. Lane 3: marker; lane 4: empty particles  
90 derived from the upper fraction. Lanes 5 and 6 represent a diluted version of samples in lanes 4  
91 and 2, respectively. The calculated molecular weights of VP1, VP2, VP3, and VP4 are 32.9 kDa,  
92 27.5 kDa, 27.1 kDa, and 7.5 kDa. Acid treatment of Prep A leads to loss of a majority of VP4  
93 from viral particles, as is evident from comparison of lanes 1 and 6.  
94

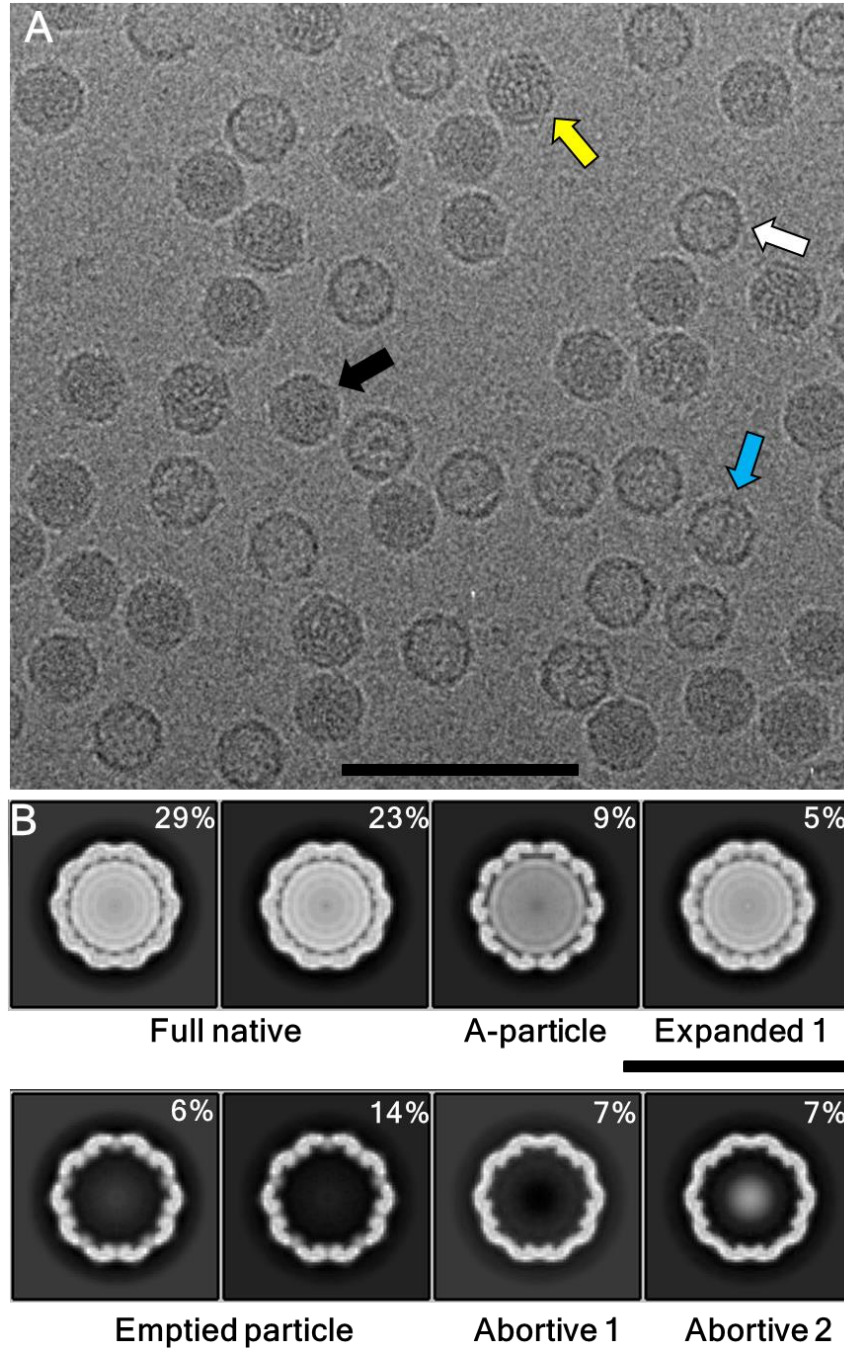

95

96 **Fig S8.** Cryo-EM analyses of a mixed population of EV-D68 particles demonstrate the presence  
 97 of multiple distinct structural states. (A) A typical electron micrograph of EV-D68 particles kept  
 98 at 4°C and at pH 7.2. Arrows with different colors indicate distinct particle forms judged by  
 99 visual inspection. Scale bar: 100 nm. (B) Three-dimensional (3D) reconstructions obtained after  
 100 3D classification show differences between structural states. The central slice of each

101 reconstruction is shown. The percentage of particles, which were used for each reconstruction,  
102 among all particles is given at the upper right corner. Scar bar: 50 nm.  
103

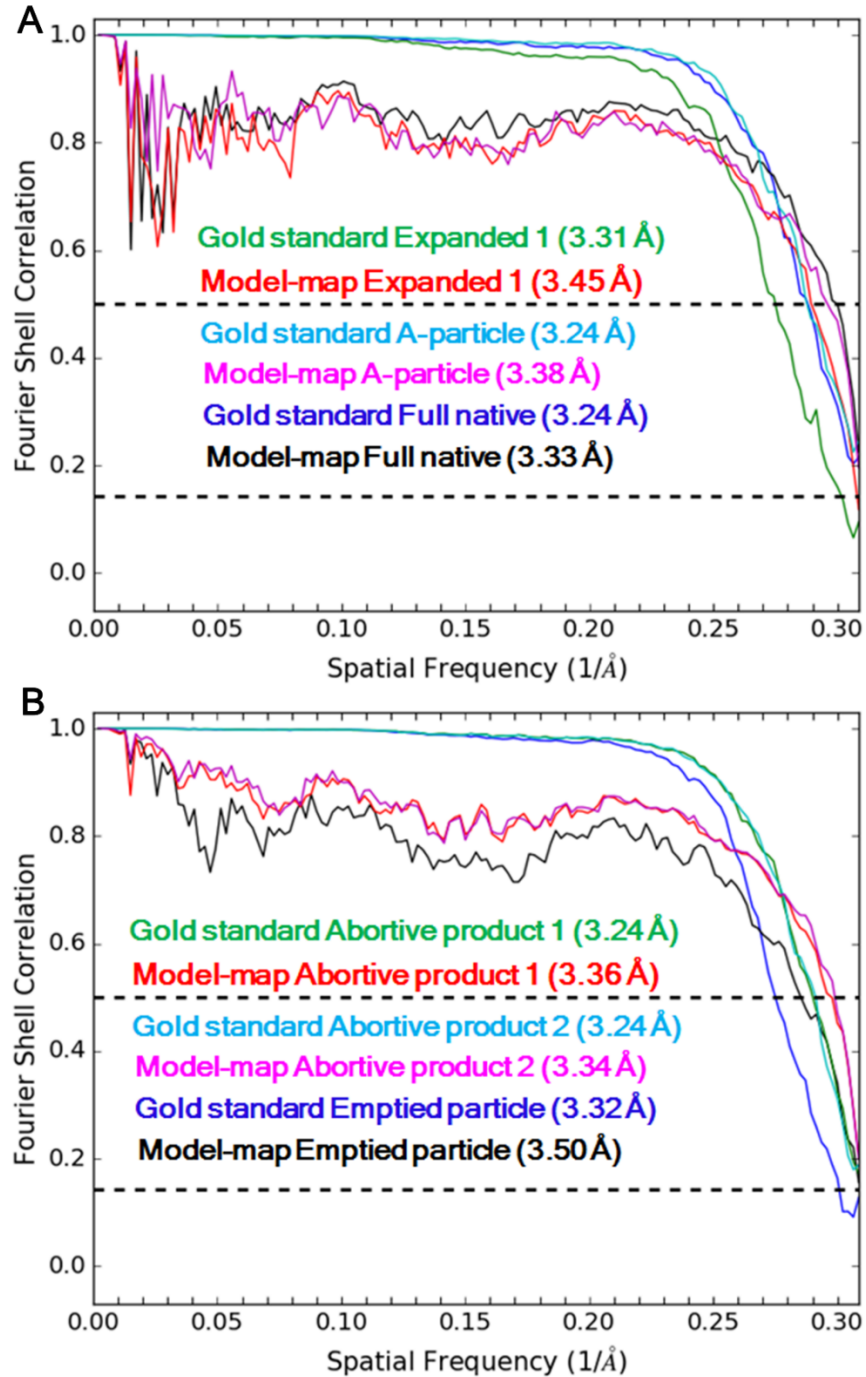

104

105 **Fig. S9.** Assessment of the resolution of cryo-EM maps (dataset B\_4\_Neu) based on FSC curves.

106 Shown are FSC curves for each of the three full particle states (**A**) and those for each of the three

107 empty particle states (**B**). Gold standard FSC and model-map FSC are defined as in **Fig. S1**.



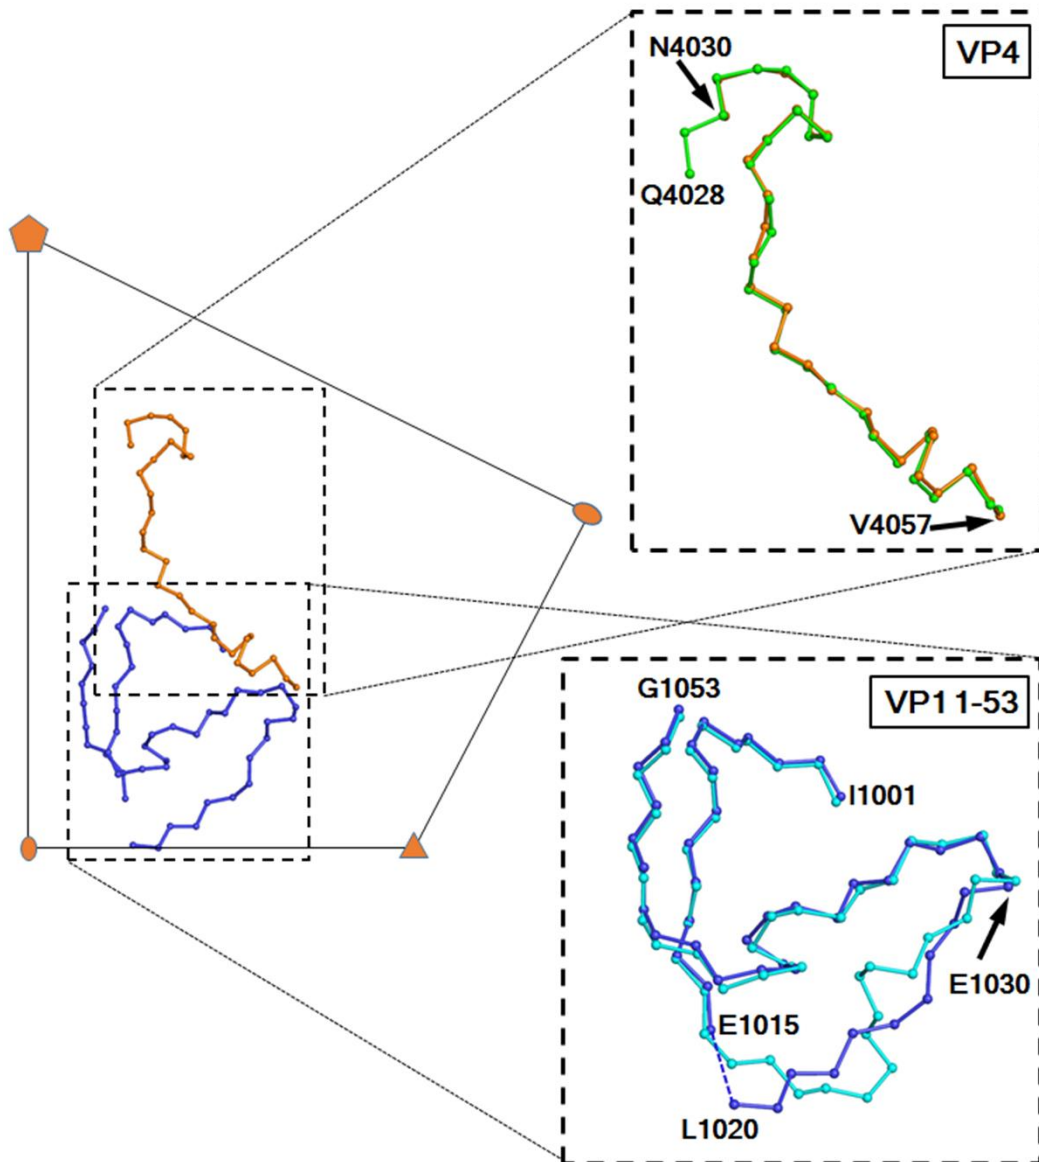

108  
 109 **Fig. S10.** Structural comparison of the ordered VP1 N-terminal residues and VP4 when  
 110 superimposing equivalent protomers in full native virions and E1 particles. The left part of this  
 111 figure shows a protomer of the E1 particle structure. Two rectangles (dashed line) indicate the  
 112 limit of close-up views on the right. Upper right rectangle:  $\alpha$  backbone trace of the ordered VP4  
 113 residues in full native virions (4028-4057, green) and E1 particles (4030-4057, orange). Lower  
 114 right rectangle:  $\alpha$  backbone trace of the ordered VP1 N-terminal residues in full native virions  
 115 (cyan) and E1 particles (blue). Residues 1016-1019 are disordered in E1 particles. The two  
 116 structures differ mainly in residues 1020-1029. This leads to destabilization of the virus as  
 117 illustrated in **Fig. S13**.

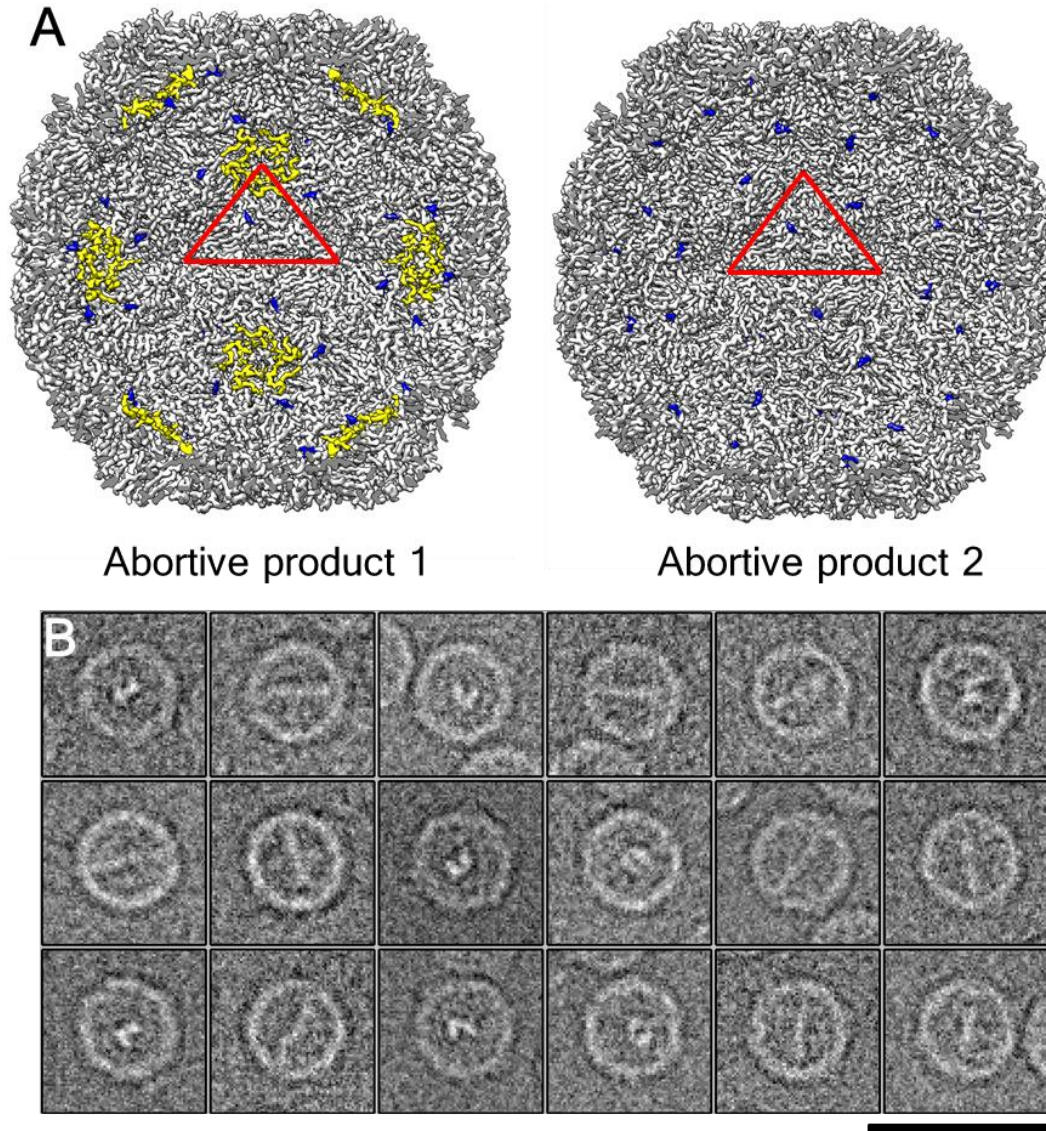

119

120

121 **Fig. S11.** Multiple structural states of EV-D68 are present at neutral pH. (A) Cut-way views of  
 122 two structural states, which probably represent abortive products during EV-D68 assembly,  
 123 when looking into the particle along an icosahedral two-fold axis. A red triangle indicates an  
 124 icosahedral asymmetric unit. The internal regions are colored as in **Fig. 3.** (B) Typical cryo-EM  
 125 images of abortive product 2 particles that show rod-like inner densities. Scale bar: 50 nm.

126

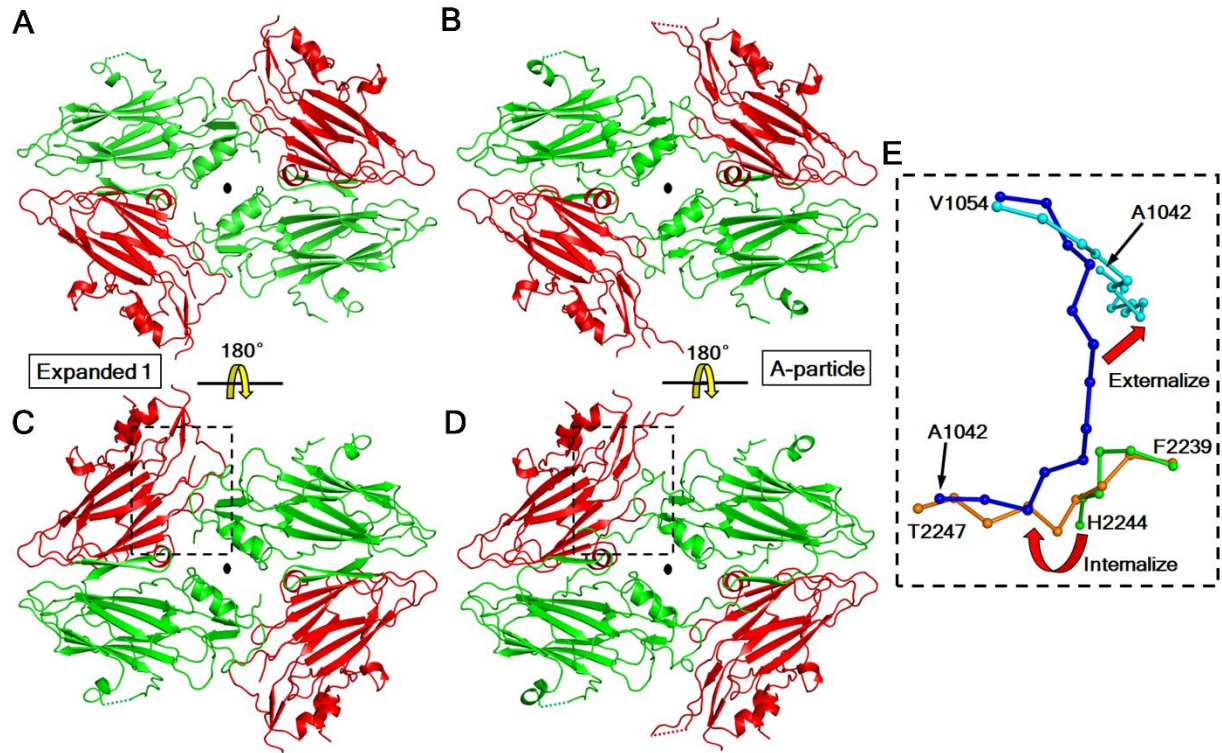

127 **Fig. S12.** Structural rearrangements around the icosahedral two fold axes when E1 particles are  
 128 converted into A-particles. (**A-D**) Pores are open around the two-fold axes in the E1 particles (**A**,  
 129 **C**) and A-particles (**B**, **D**). Shown are VP2 (green) and VP3 (red) when viewing the particle  
 130 through an icosahedral two-fold axis. Either the outer surface (**A-B**) or the inner surface (**C-D**) of  
 131 the particle points towards the viewer. (**E**) A major difference around the two fold axes between  
 132 these two types of particles lies in the VP2 C-terminus when superimposing equivalent  
 133 protomers of the E1 particles (VP1: blue, VP2: green) and A-particles (VP1: cyan; VP2: orange).  
 134 The limit of this close-up view corresponds to that outlined by a rectangle in **C** and in **D**. When  
 135 the E1 particles are converted into the A-particles, internalization of the VP2 C-terminal tails  
 136 promotes the externalization of the VP1 N-termini.  
 137



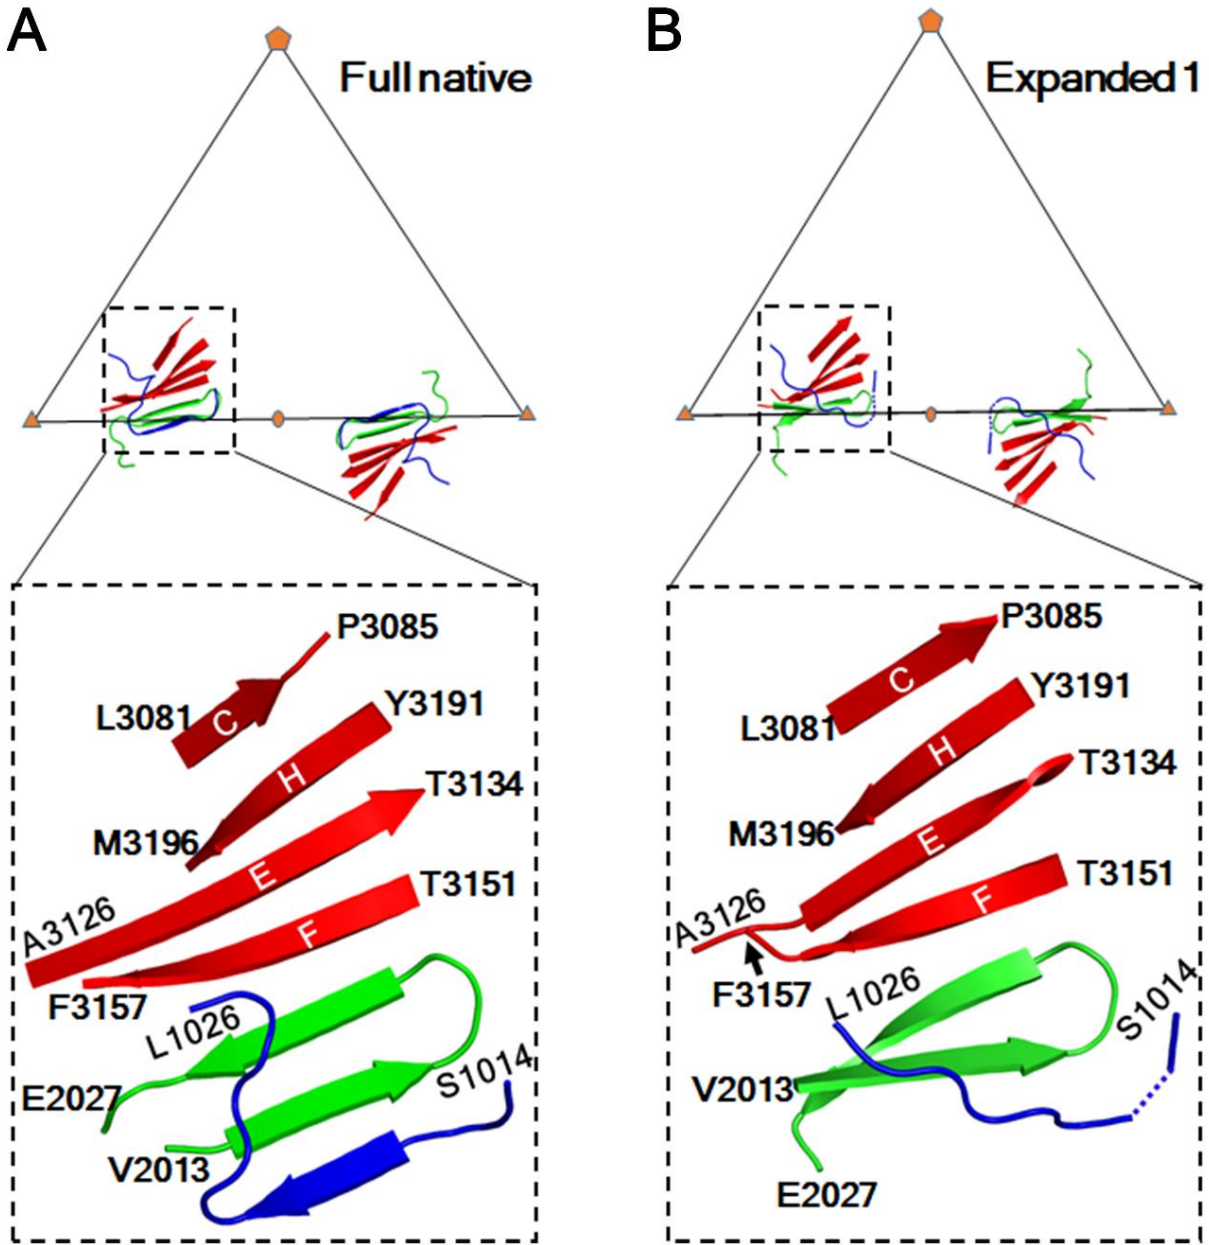

138

139 **Fig. S13.** The seven-stranded interpentamer sheets in full native virions (**A**) are partially  
 140 disrupted in E1 particles (**B**). Each triangle indicates an icosahedral asymmetric unit. VP1, VP2,  
 141 and VP3 are colored blue, green, and red, respectively. In each panel, a rectangle (dashed line) in  
 142 the upper triangle defines the limit of the close-up view in the large bottom rectangle (dashed  
 143 line), which is slightly tilted for better visualization. The  $\beta$ -strands C, H, E, and F in VP3 are  
 144 labelled by their corresponding letters. Residues 1016-1019 are disordered in the E1 particle  
 145 structure.

146



| Full native |             |         | Expanded 1 |             |         | A-particle |             |         |
|-------------|-------------|---------|------------|-------------|---------|------------|-------------|---------|
| Chain       | Residue No. | Residue | Chain      | Residue No. | Residue | Chain      | Residue No. | Residue |
| A7          | 1014        | SER     | A7         | 1021        | GLY     | B6         | 2242        | LEU     |
| A7          | 1015        | GLU     | A7         | 1022        | VAL     | B6         | 2244        | HIS     |
| A7          | 1016        | ILE     | A7         | 1023        | VAL     | B6         | 2245        | ALA     |
| A7          | 1017        | ASN     | A7         | 1024        | PRO     | B6         | 2247        | THR     |
| A7          | 1018        | ALA     | A7         | 1026        | LEU     | C7         | 3150        | GLY     |
| A7          | 1019        | GLU     | A7         | 1042        | ALA     | C7         | 3151        | THR     |
| A7          | 1020        | LEU     | C7         | 3150        | GLY     | C7         | 3152        | HIS     |
| A7          | 1021        | GLY     | C7         | 3151        | THR     | C7         | 3153        | ILE     |
| A7          | 1023        | VAL     | C7         | 3152        | HIS     | C7         | 3154        | VAL     |
| A7          | 1024        | PRO     | C7         | 3153        | ILE     | C7         | 3155        | TRP     |
| A7          | 1025        | SER     | C7         | 3154        | VAL     | C7         | 3159        | LEU     |
| A7          | 1026        | LEU     | C7         | 3155        | TRP     | C7         | 3160        | GLN     |
| A7          | 1040        | GLU     | C7         | 3159        | LEU     | C7         | 3163        | VAL     |
| A7          | 1041        | GLU     | C7         | 3160        | GLN     |            |             |         |
| A7          | 1042        | ALA     |            |             |         |            |             |         |
| A7          | 1043        | ILE     |            |             |         |            |             |         |
| A7          | 1044        | GLN     |            |             |         |            |             |         |
| B6          | 2242        | LEU     |            |             |         |            |             |         |
| C7          | 3128        | LYS     |            |             |         |            |             |         |
| C7          | 3149        | LEU     |            |             |         |            |             |         |
| C7          | 3150        | GLY     |            |             |         |            |             |         |
| C7          | 3151        | THR     |            |             |         |            |             |         |
| C7          | 3152        | HIS     |            |             |         |            |             |         |
| C7          | 3153        | ILE     |            |             |         |            |             |         |
| C7          | 3154        | VAL     |            |             |         |            |             |         |
| C7          | 3155        | TRP     |            |             |         |            |             |         |
| C7          | 3156        | ASP     |            |             |         |            |             |         |
| C7          | 3158        | GLY     |            |             |         |            |             |         |
| C7          | 3159        | LEU     |            |             |         |            |             |         |
| C7          | 3160        | GLN     |            |             |         |            |             |         |
| C7          | 3163        | VAL     |            |             |         |            |             |         |

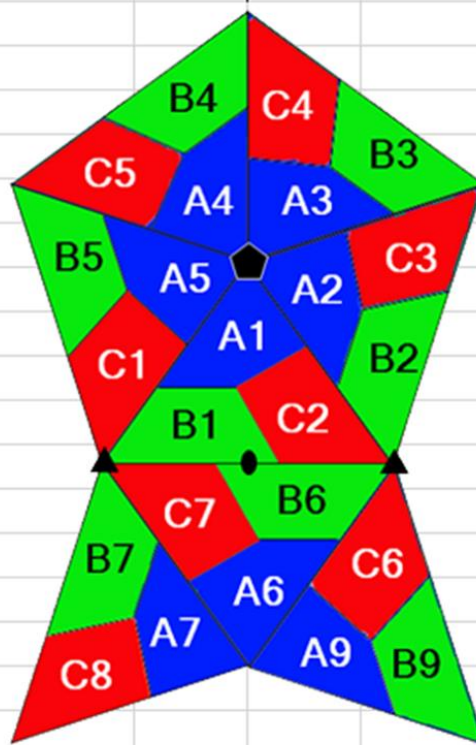

147  
148  
149 **Fig. S14.** Structural reorganization of the VP2 N-termini weakens the interpentamer contact  
150 during uncoating. A schematic (bottom right) of eight icosahedral asymmetric units of the capsid  
151 is colored blue (VP1), green (VP2), and red (VP3). Each subunit is labelled by a chain number

152 (e.g., A1). For each of the three full particle states (dataset B\_4\_Neu), the residues listed above  
153 are within a distance of 4 Å to any atom of residues 2013-2026 in chain B1.

154

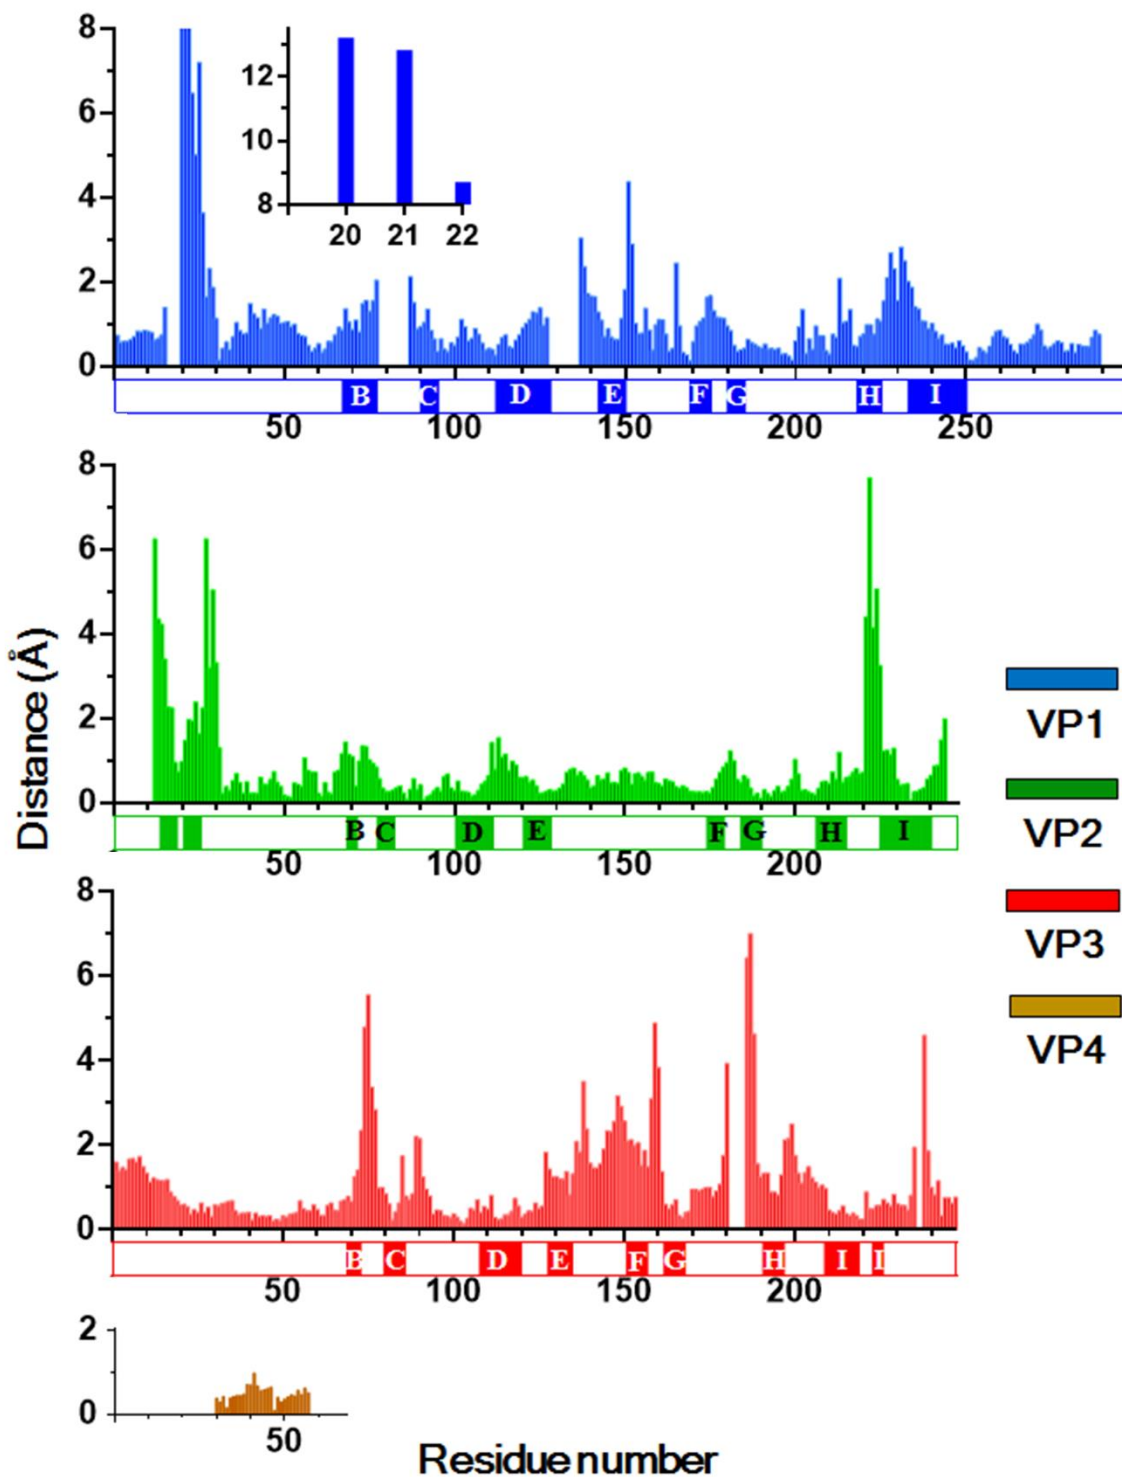

155  
 156 **Fig. S15.** Distances between equivalent Ca atoms upon superposition of equivalent protomers in  
 157 full native virions and E1 particles. Rectangular blocks denote residues that form  $\beta$ -strands. The

158 jelly roll  $\beta$ -strands B, C, D, E, F, G, H, and I are labelled by their corresponding letters. The inset  
159 shows a close-up view of the plot for the VP1 N-terminal residues 1020-1022.  
160



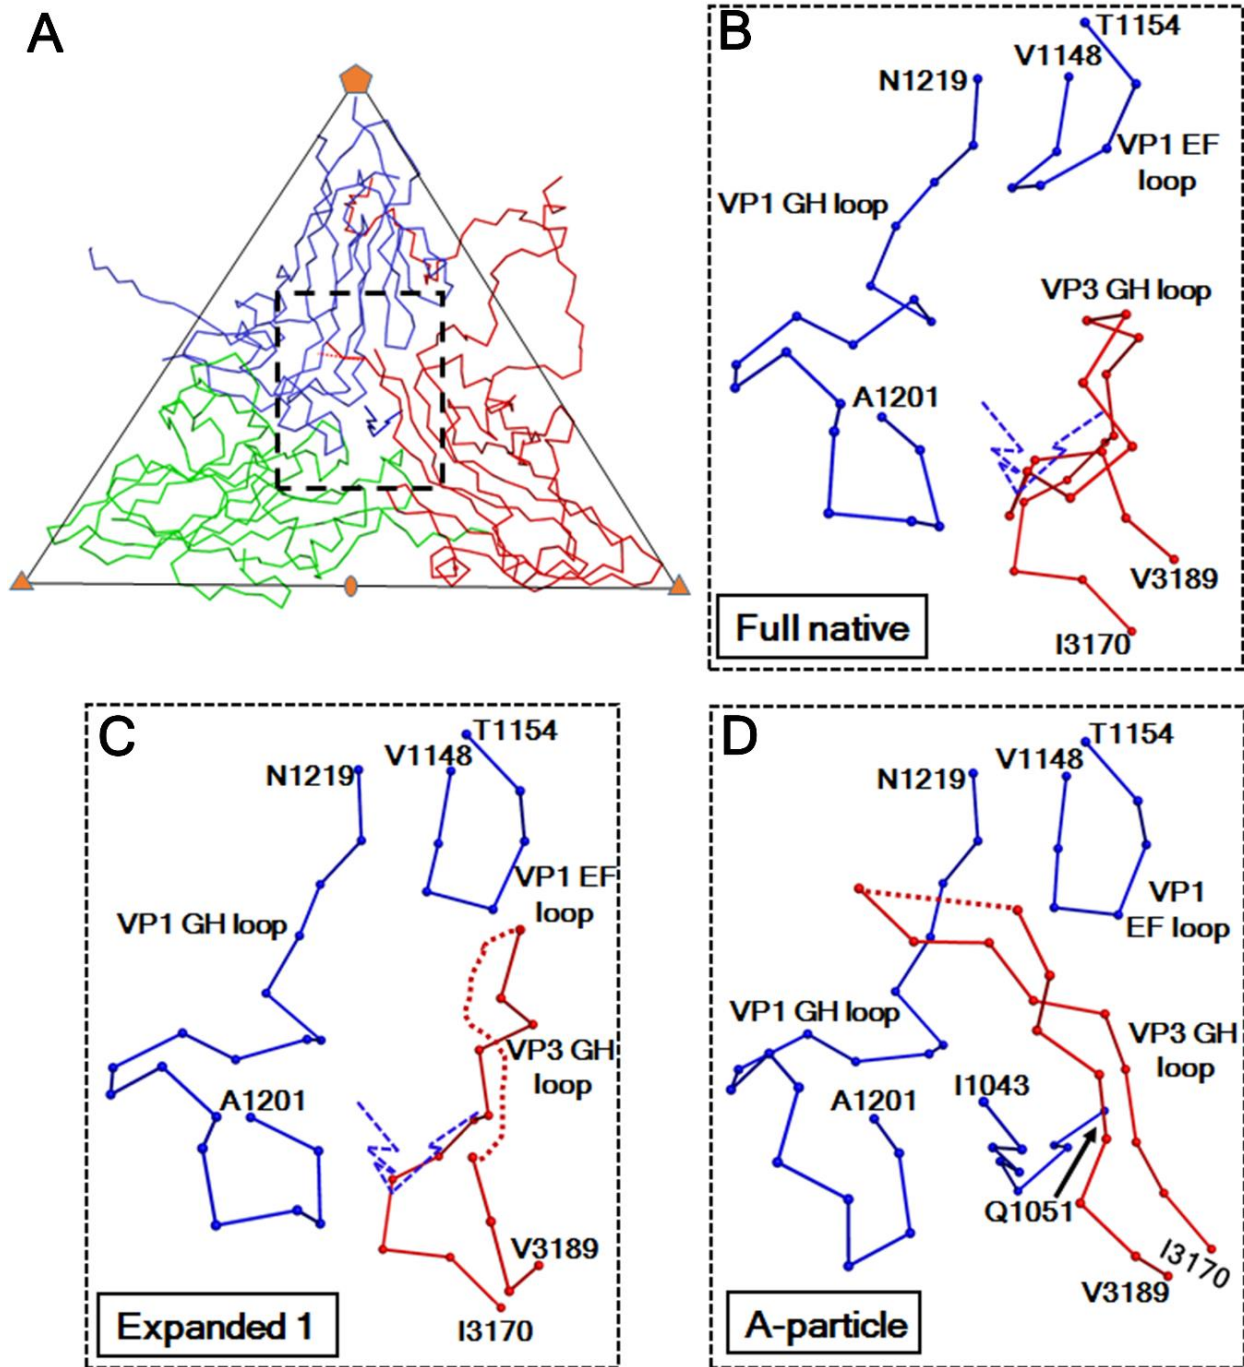

161

162

163

164

165

166

**Fig. S16.** Structural rearrangements of loops near the quasi-three-fold axes facilitate the externalization of the VP1 N-termini. (A) The  $C\alpha$  backbone representation of an icosahedral asymmetric unit of the A-particle structure is colored blue (VP1), green (VP2), and red (VP3). The rectangle (dashed line) indicates the limit of the close-up views in (B-D). (B) The structure of full native virions after superimposition of equivalent protomers in full native virions and A-

167 particles. (C) The structure of E1 particles after superimposition of equivalent protomers in E1-  
168 particles and A-particles. In these two panels, a blue dashed line represents the C $\alpha$  backbone  
169 trace of the VP1 N-terminal residues 1043-1051 observed in the A-particle structure. These  
170 residues would clash with the VP3 GH loop in full native virions and with that in E1 particles.  
171 The VP3 GH loop adopts a coiled conformation in full native virions. This loop becomes  
172 partially disordered and adopts a more extended conformation in the other two structural states.  
173

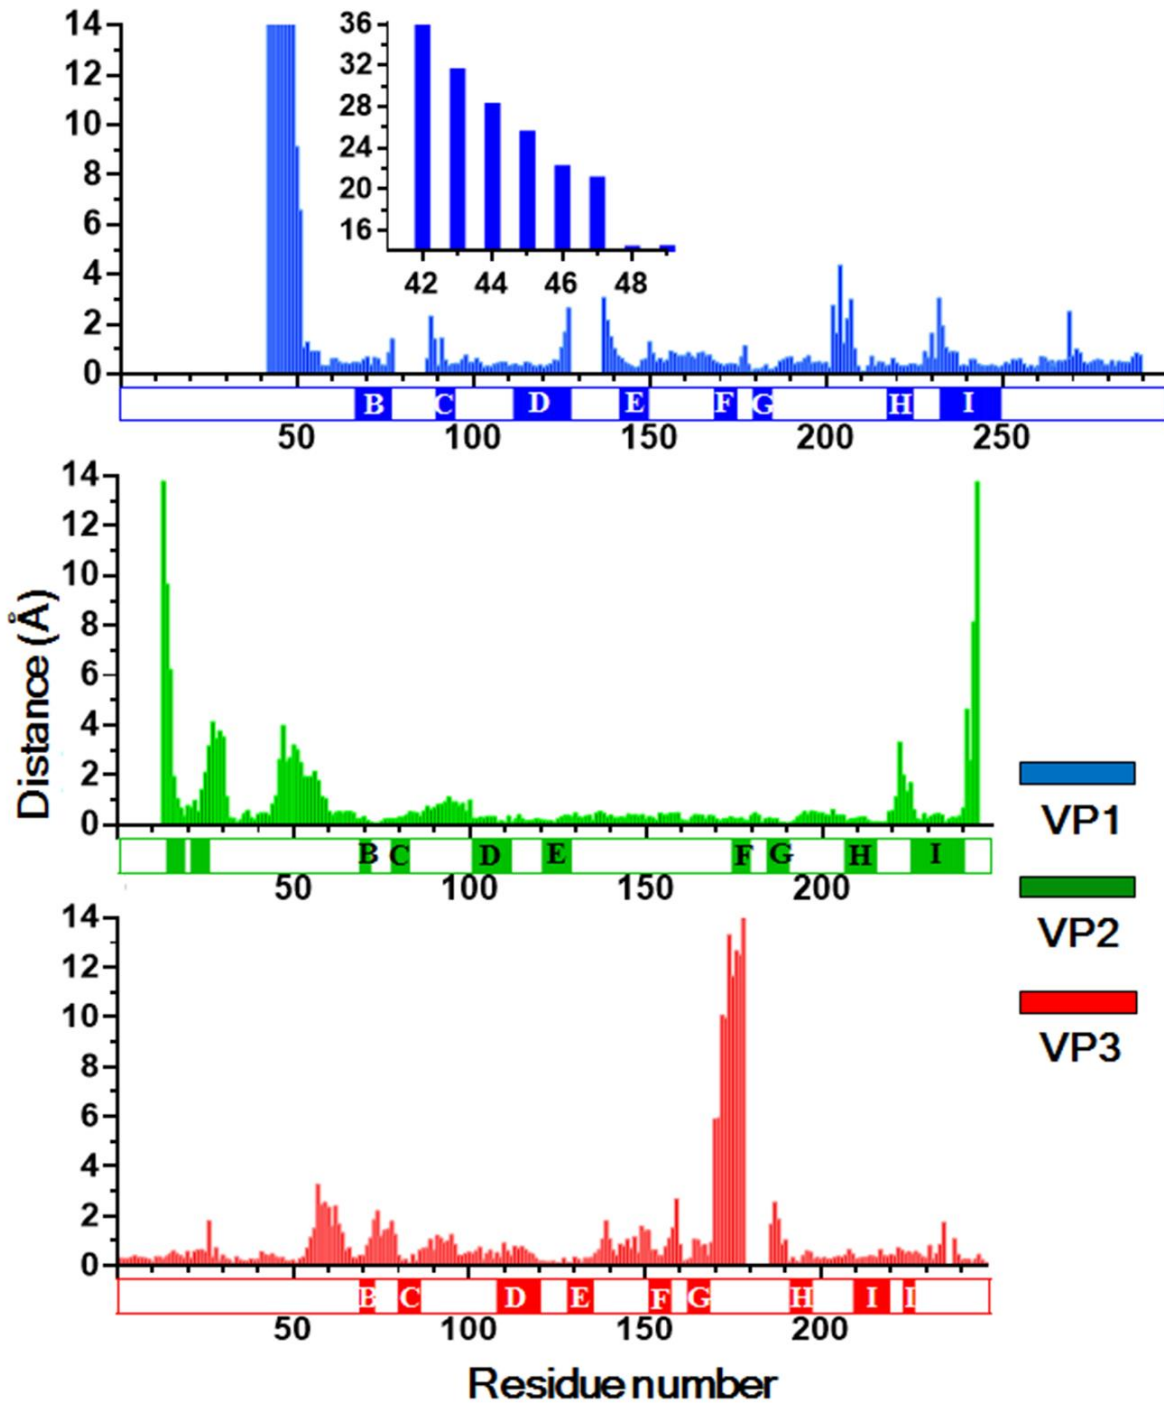

174

175 **Fig. S17.** Distances between equivalent Ca atoms upon superposition of the equivalent  
 176 protomers in E1 particles and A-particles. The rectangular blocks are defined as in **Fig. S13**. The  
 177 inset shows a close-up view of the plot for the VP1 N-terminal residues 1042-1049.

178

179 **Table S1. Cryo-EM data statistics.**

|                                                   | A_Native<br>(full) | B_RT_Acid<br>(A-particle) | B_RT_Acid<br>(emptied) | B_33_Acid<br>(A-particle) | B_33_Acid<br>(emptied) |
|---------------------------------------------------|--------------------|---------------------------|------------------------|---------------------------|------------------------|
| <b>Data collection and processing<sup>a</sup></b> |                    |                           |                        |                           |                        |
| No. of micrographs <sup>b</sup>                   | 642                | 144                       | 144                    | 950                       | 950                    |
| Pixel size <sup>c</sup> (Å/pixel)                 | 0.65               | 0.65                      | 0.65                   | 0.65                      | 0.65                   |
| Dose rate (e-/pixel/s)                            | 8                  | 8                         | 8                      | 8                         | 8                      |
| Total dose (e-/Å <sup>2</sup> )                   | 36                 | 28                        | 28                     | 38                        | 38                     |
| Frame rate (ms)                                   | 200                | 200                       | 200                    | 200                       | 200                    |
| Defocus (µm)                                      | 0.3-3.0            | 0.9-4.8                   | 0.9-4.8                | 0.5-3.5                   | 0.5-3.5                |
| No. of ptcls for reconstruction                   | 16021              | 3708                      | 2150                   | 23082                     | 19325                  |
| Resolution <sup>d</sup> (Å)                       | 2.17               | 3.25                      | 3.75                   | 2.73                      | 2.90                   |
| Map sharpening B-factor (Å <sup>2</sup> )         | -83.0              | -125.7                    | -163.7                 | -120.2                    | -144.1                 |
| <b>Model Statistics</b>                           |                    |                           |                        |                           |                        |
| Correlation coefficient <sup>e</sup>              | 0.838              | 0.834                     | 0.829                  | 0.848                     | 0.846                  |
| <u>No. of atoms</u>                               |                    |                           |                        |                           |                        |
| Protein                                           | 6822               | 5362                      | 5025                   | 5579                      | 5083                   |
| Water                                             | 493                | 0                         | 0                      | 252                       | 0                      |
| Avg. B-factor (Å <sup>2</sup> )                   | 18.2               | 39.9                      | 49.2                   | 30.4                      | 32.5                   |
| <u>r.m.s deviations<sup>f</sup></u>               |                    |                           |                        |                           |                        |
| Bond lengths (Å)                                  | 0.010              | 0.009                     | 0.008                  | 0.010                     | 0.011                  |
| Bond angles (°)                                   | 1.355              | 1.261                     | 1.151                  | 1.327                     | 1.261                  |
| <u>Ramachadran plot<sup>f</sup></u>               |                    |                           |                        |                           |                        |
| Favored (%)                                       | 96.1               | 94.0                      | 91.7                   | 94.7                      | 93.6                   |
| Allowed (%)                                       | 3.6                | 5.8                       | 7.8                    | 5.0                       | 5.9                    |
| Outliers (%)                                      | 0.3                | 0.2                       | 0.5                    | 0.3                       | 0.5                    |

180 <sup>a</sup> Cryo-EM data were collected using an FEI Titan Krios transmission electron microscope operated at 300 kV and  
 181 equipped with a Gatan K2 Summit direct electron detector.

182 <sup>b</sup> Micrographs from which particles were selected.

183 <sup>c</sup> Super resolution pixel size. The physical pixel size is 1.3 Å/pixel.

184 <sup>d</sup> Estimated based on Fourier shell correlation between two half maps using a cutoff of 0.143 (69).

185 <sup>e</sup> Between the cryo-EM map and a map calculated based on the atomic model specifying the cryo-EM map  
 186 resolution.

187 <sup>f</sup> Based on the criteria of MolProbity (76).

188

189 **Table S2. Root-mean-square deviations (Å) between pairs of EV-D68 structures.<sup>a</sup>**  
 190

|                          | Native_full <sup>b</sup> | RT_A <sup>c</sup> | RT_EMP <sup>c</sup> | 33_A <sup>d</sup> | 33_EMP <sup>d</sup> |
|--------------------------|--------------------------|-------------------|---------------------|-------------------|---------------------|
| Native_full <sup>b</sup> | -                        |                   |                     |                   |                     |
| RT_A <sup>c</sup>        | 5.7                      | -                 |                     |                   |                     |
| RT_EMP <sup>c</sup>      | 4.6                      | 0.8               | -                   |                   |                     |
| 33_A <sup>d</sup>        | 5.7                      | 0.6               | 0.7                 | -                 |                     |
| 33_EMP <sup>d</sup>      | 4.6                      | 0.7               | 0.6                 | 0.5               | -                   |

191 <sup>a</sup> Calculated based on equivalent C $\alpha$  atoms when icosahedral symmetry axes are aligned.

192 <sup>b</sup> Dataset A\_Native.

193 <sup>c</sup> Dataset B\_RT\_Acid. A and EMP refer to A-particle and emptied particle, respectively.

194 <sup>d</sup> Dataset B\_33\_Acid. A and EMP refer to A-particle and emptied particle, respectively.

195



196 **Table S3. Root-mean-square deviations<sup>a</sup> between pairs of structures that belong to the**  
 197 **same structural state.**

| Structure A         | Structure B         | r.m.s.d (Å) | # of equivalent C $\alpha$ atoms |
|---------------------|---------------------|-------------|----------------------------------|
| A_Native-full       | B_4_Neu-Full-Native | 0.5         | 800                              |
| B_RT_Acid-Aparticle | B_33_Acid-Aparticle | 0.6         | 679                              |
| B_4_Neu-Aparticle   | B_RT_Acid-Aparticle | 0.7         | 685                              |
| B_4_Neu-Aparticle   | B_33_Acid-Aparticle | 0.8         | 679                              |
| B_RT_Acid-Emptied   | B_33_Acid-Emptied   | 0.6         | 638                              |
| B_4_Neu-Emptied     | B_RT_Acid-Emptied   | 0.7         | 639                              |
| B_4_Neu-Emptied     | B_33_Acid-Emptied   | 0.6         | 643                              |
| B_4_Neu-E1          | A_Acid_1-E1         | 0.5         | 768                              |

198 <sup>a</sup>Calculated based on equivalent C $\alpha$  atoms upon superposition of equivalent protomers in each pair of structures.  
 199

200  
201

**Table S4. CryoEM data statistics.**

|                                              | A_1 <sup>a</sup> | A_1 <sup>a</sup> | A_1 <sup>a</sup> | A_2 <sup>a</sup> | A_2 <sup>a</sup> | A_3 <sup>a</sup> | A_3 <sup>a</sup> | A_4 <sup>a</sup> |
|----------------------------------------------|------------------|------------------|------------------|------------------|------------------|------------------|------------------|------------------|
| Temperature                                  | 4                | 4                | 4                | RT               | RT               | RT               | RT               | RT               |
| pH                                           | 6.5              | 6.5              | 6.5              | 6.5              | 6.5              | 6                | 6                | 6                |
| Time <sup>b</sup>                            | 3min             | 3min             | 3min             | 3min             | 3min             | 30s              | 30s              | 3min             |
| Structural state <sup>c</sup>                | Native           | E1               | A-               | Native           | A-               | Native           | A-               | A-               |
| No. of micrographs <sup>d</sup>              | 357              | 357              | 357              | 774              | 774              | 884              | 884              | 118              |
| Defocus <sup>e</sup> (μm)                    | 0.5-8.5          | 0.5-8.5          | 0.5-8.5          | 0.5-7.0          | 0.5-7.0          | 1.1-5.4          | 1.1-5.4          | 1.7-5.7          |
| Pixel size (Å/pixel)                         | 1.73             | 1.73             | 1.73             | 1.73             | 1.73             | 1.73             | 1.73             | 1.73             |
| Dose rate (e <sup>-</sup> /pixel/s)          | 8                | 8                | 8                | 8                | 8                | 8                | 8                | 8                |
| Frame rate (ms)                              | 250              | 250              | 250              | 250              | 250              | 250              | 250              | 250              |
| Total dose (e <sup>-</sup> /Å <sup>2</sup> ) | 28               | 28               | 28               | 28               | 28               | 28               | 28               | 28               |
| # particles for reconstruction               | 15000            | 4968             | 2324             | 16000            | 14000            | 16000            | 14000            | 19798            |
| Resolution <sup>f</sup> (Å)                  | 3.46             | 3.46             | 3.46             | 3.46             | 3.46             | 3.46             | 3.46             | 3.46             |
| Map sharpening B-factor (Å <sup>2</sup> )    | -124.4           | -108.9           | -85.9            | -140.5           | -154.1           | -142.1           | -159.6           | -148.7           |

202  
203  
204  
205  
206  
207  
208

<sup>a</sup> For clarification, "Acid\_" is omitted from dataset names.

<sup>b</sup> Approximate time from the initiation of acid treatment to the state of being quenched by freezing.

<sup>c</sup> Three structural states are Native (full native virions), E1 (expanded 1 particles), and A- (A-particles).

<sup>d</sup> Micrographs from which particles were selected.

<sup>e</sup> Mean±SD: 3.9±1.6 (Acid\_A\_1), 3.3±1.3 (Acid\_A\_2), 3.1±0.7 (Acid\_A\_3), 3.1±0.8 (Acid\_A\_4).

<sup>f</sup> Estimated based on Fourier shell correlation between two half maps using a cutoff of 0.143 (69).

209  
210

**Table S5. Cryo-EM data statistics for dataset B\_4\_Neu.**

|                                                     | full_1          | full_2        | full_3        | emp_1            | emp_2                           | emp_3                           |
|-----------------------------------------------------|-----------------|---------------|---------------|------------------|---------------------------------|---------------------------------|
| <b>Data collection and processing<sup>a</sup></b>   |                 |               |               |                  |                                 |                                 |
| (Probable) identity of the state                    | Full native     | Expanded 1    | A-particle    | Emptied particle | Abortive product 1 <sup>f</sup> | Abortive product 2 <sup>f</sup> |
| No. of micrographs <sup>b</sup>                     | 1767            | 1767          | 1767          | 1767             | 1767                            | 1767                            |
| Defocus ( $\mu\text{m}$ )                           | 0.9-5.9         | 0.9-6.0       | 0.9-5.9       | 0.9-6.0          | 0.9-5.9                         | 0.9-5.9                         |
| Pixel size ( $\text{\AA}/\text{pixel}$ )            | 1.62            | 1.62          | 1.62          | 1.62             | 1.62                            | 1.62                            |
| Dose rate ( $\text{e}^-/\text{pixel}/\text{s}$ )    | 8               | 8             | 8             | 8                | 8                               | 8                               |
| Frame rate (ms)                                     | 250             | 250           | 250           | 250              | 250                             | 250                             |
| Total dose ( $\text{e}^-/\text{\AA}^2$ )            | 45              | 45            | 45            | 45               | 45                              | 45                              |
| No. of particles obtained after 3D classification   | 124,865 (52.6%) | 10,935 (4.6%) | 20,755 (8.7%) | 47,523 (20.0%)   | 16,981 (7.2%)                   | 16,381 (6.9%)                   |
| No. of particles for reconstruction                 | 10,000          | 10,935        | 20,000        | 20,000           | 13,000                          | 13,000                          |
| Resolution <sup>c</sup> ( $\text{\AA}$ )            | 3.24            | 3.31          | 3.24          | 3.32             | 3.24                            | 3.24                            |
| Map sharpening B-factor ( $\text{\AA}^2$ )          | -155.6          | -162.6        | -161.7        | -175.1           | -157.1                          | -157.7                          |
| <b>Model Statistics</b>                             |                 |               |               |                  |                                 |                                 |
| Correlation coefficient <sup>d</sup>                | 0.855           | 0.843         | 0.842         | 0.822            | 0.850                           | 0.852                           |
| No. of atoms (protein)                              | 6262            | 6001          | 5414          | 5124             | 5772                            | 5638                            |
| Avg. B-factor ( $\text{\AA}^2$ )                    | 33.5            | 44.7          | 40.4          | 56.0             | 34.5                            | 32.4                            |
| R.M.S.D. Bond lengths <sup>e</sup> ( $\text{\AA}$ ) | 0.009           | 0.012         | 0.010         | 0.009            | 0.008                           | 0.008                           |
| R.M.S.D. Bond angles <sup>e</sup> ( $^\circ$ )      | 1.203           | 1.271         | 1.225         | 1.205            | 1.188                           | 1.184                           |
| Ramachadran plot favored <sup>e</sup> (%)           | 94.7            | 94.5          | 93.2          | 93.1             | 95.6                            | 94.1                            |
| Ramachadran plot allowed <sup>e</sup> (%)           | 5.3             | 5.5           | 6.6           | 6.7              | 4.4                             | 5.8                             |
| Ramachadran plot outliers <sup>e</sup> (%)          | 0.0             | 0.0           | 0.2           | 0.2              | 0.0                             | 0.1                             |

211 <sup>a</sup> Cryo-EM data were collected using an FEI Titan Krios transmission electron microscope operated at 300 kV and  
212 equipped with a Gatan K2 Summit direct electron detector.

213 <sup>b</sup> Micrographs from which particles were selected.

214 <sup>c</sup> Estimated based on Fourier shell correlation between two half maps using a cutoff of 0.143 (69).

215 <sup>d</sup> Between cryo-EM map and a map calculated based on the atomic model specifying the cryo-EM map resolution.

216 <sup>e</sup> Based on the criteria of MolProbity (76).

217 <sup>f</sup> Abortive 1 probably represents native empty particles, while Abortive 2 contains rod-like inner densities.

218 **Table S6. Root-mean-square deviations ( $\text{\AA}$ ) between pairs of structures (dataset B\_4\_Neu).<sup>a</sup>**  
 219

|                    | Full native | Expanded 1 | A-particle | Emptied particle | Abortive product 2 | Abortive product 1 |
|--------------------|-------------|------------|------------|------------------|--------------------|--------------------|
| Full native        | -           |            |            |                  |                    |                    |
| Expanded 1         | 4.4         | -          |            |                  |                    |                    |
| A-particle         | 6.0         | 3.3        | -          |                  |                    |                    |
| Emptied particle   | 4.9         | 1.1        | 1.1        | -                |                    |                    |
| Abortive product 2 | 1.0         | 3.5        | 4.3        | 4.0              | -                  |                    |
| Abortive product 1 | 1.1         | 3.5        | 4.3        | 4.0              | 0.3                | -                  |

220 <sup>a</sup>Calculated based on equivalent C $\alpha$  atoms when icosahedral symmetry axes are aligned.  
 221

222 **Table S7. Rigid body movements of capsid proteins when full native virions are converted**  
 223 **into E1 particles.**

| Protein | Psi <sup>a</sup> (°) | Phi <sup>a</sup> (°) | Kappa <sup>b</sup> (°) | Translation (Å) | r.m.s.d. <sup>c</sup> (Å) |
|---------|----------------------|----------------------|------------------------|-----------------|---------------------------|
| VP1     | 77.0                 | 38.0                 | 2.8                    | 4.5             | 1.1                       |
| VP2     | 83.5                 | 17.5                 | 3.3                    | 3.4             | 1.3                       |
| VP3     | 71.6                 | 15.2                 | 2.8                    | 3.9             | 1.4                       |
| VP4     | 48.7                 | 40.8                 | 3.3                    | 4.7             | 0.3                       |

224 <sup>a</sup> These two polar angles define the direction of the rotational axis according to (81).

225 <sup>b</sup> Clockwise rotation as viewed out from inside the virus.

226 <sup>c</sup> Between equivalent C $\alpha$  atoms.

227



228 **Table S8. Buried surface areas ( $\text{\AA}^2$ ) at the intra-protomer protein-protein interacting**  
 229 **interfaces.<sup>a</sup>**

| Structure                           | Interfaces          |         |         |         |         |         |
|-------------------------------------|---------------------|---------|---------|---------|---------|---------|
|                                     | VP1-VP3             | VP1-VP2 | VP2-VP3 | VP1-VP4 | VP3-VP4 | VP2-VP4 |
| Full native                         | 4347.7              | 1931.2  | 1701.8  | 840.3   | 768.6   | 293.6   |
| Expanded 1                          | 3849.0              | 1978.0  | 1684.6  | 836.3   | 746.1   | 307.3   |
| A-particle                          | 3048.0 <sup>b</sup> | 1624.6  | 1713.8  | -       | -       | -       |
| Emptied particle                    | 2511.6              | 1636.9  | 1687.2  | -       | -       | -       |
| Full native-Expanded 1 <sup>c</sup> | 3959.9              | 1948.2  | 1701.8  | 840.3   | 747.0   | 293.6   |
| Expanded 1-A-particle <sup>c</sup>  | 2681.7 <sup>b</sup> | 1656.4  | 1737.9  | -       | -       | -       |
| A-particle-Emptied <sup>c</sup>     | 2538.0              | 1632.6  | 1686.5  | -       | -       | -       |

230 <sup>a</sup> The buried surface areas were calculate using the program PISA (79).

231 <sup>b</sup> The interactions between the externalized VP1 N-terminus and the VP3 GH loop contribute to an increase of the  
 232 VP1-VP3 interaction area in A-particles with respect to E1-particles.

233 <sup>c</sup> A-B refers to a modified structure of A in which only atoms equivalent to B are retained.

234  
235**Table S9. Comparison of buried surface areas at the interpentamer interfaces.**

| Genus                                                | Species                             | Virus                   | PDB    | Buried surface Area <sup>a</sup> (Å <sup>2</sup> ) | Acid labile? |
|------------------------------------------------------|-------------------------------------|-------------------------|--------|----------------------------------------------------|--------------|
| <b>Enterovirus</b>                                   | Enterovirus A                       | EV-A71                  | 3ZFE   | 5982.1                                             | No           |
|                                                      |                                     | CV-A16                  | 5C4W   | 5796.0                                             | No           |
|                                                      | Enterovirus B                       | CVB3                    | 4GB3   | 5411.4                                             | No           |
|                                                      |                                     | CVA9                    | 1D4M   | 5147.6                                             | No           |
|                                                      | Enterovirus C                       | PV1                     | 1ASJ   | 5332.0                                             | No           |
|                                                      |                                     | PV3                     | 1PVC   | 5125.3                                             | No           |
|                                                      | Enterovirus D                       | EV-D68 (Fermon)         | 4WM8   | 5330.3                                             | Yes          |
|                                                      |                                     | EV-D68 (MO, A_Native)   | 6CSG   | 5046.4                                             | Yes          |
|                                                      | Rhinovirus A                        | RV-A16                  | 1AYM   | 4751.6                                             | Yes          |
|                                                      |                                     | RV-A2                   | 1FPN   | 4605.5                                             | Yes          |
|                                                      | Rhinovirus B                        | RV-B3                   | 1RHI   | 5123.1                                             | Yes          |
|                                                      |                                     | RV-B14                  | 4RHV   | 5112.0                                             | Yes          |
| Rhinovirus C                                         | RV-C15                              | 5K0U                    | 4613.2 | Yes                                                |              |
| <b>Aphthovirus</b>                                   | Foot-and-mouth disease virus (FMDV) | FMDV <sup>c</sup>       | 1BBT   | 4599.5                                             | Yes          |
| <b>Cardiovirus</b>                                   | Encephalomyocarditis virus          | Mengovirus <sup>d</sup> | 2MEV   | 4774.8                                             | Yes          |
| <b>Structural states of EV-D68 (Dataset B_4_Neu)</b> |                                     | Full native             | 6CRR   | 5183.7                                             |              |
|                                                      |                                     | Expanded 1              | 6CS3   | 3555.0                                             |              |
|                                                      |                                     | A-particle              | 6CRS   | 2925.9                                             |              |
|                                                      |                                     | Emptied particle        | 6CRU   | 2482.5                                             |              |

236 <sup>a</sup> Calculated using the program PISA (79).237 <sup>b</sup> To be assigned by the Protein Data Bank.238 <sup>c</sup> Acidification causes dissociation of the capsid into pentamers (82).239 <sup>d</sup> The capsid is broken apart to form pentamers under low pH and in the presence of halide anions (52).

240

241 **Table S10. Acid labile enteroviruses possess more histidines in capsid proteins than acid**  
 242 **resistant enteroviruses.<sup>a</sup>**

| Species       | Virus               | PDB  | Total No. of amino acids <sup>b</sup> | No. of His | Mean No. of His | Acid lability? |
|---------------|---------------------|------|---------------------------------------|------------|-----------------|----------------|
| Enterovirus A | EV-A71              | 3ZFE | 862                                   | 18         |                 |                |
|               | CV-A16              | 5C4W | 862                                   | 21         |                 |                |
| Enterovirus B | CVB3                | 4GB3 | 850                                   | 17         | 19              | Resistant      |
|               | CVA9                | 1D4M | 866                                   | 22         |                 |                |
| Enterovirus C | PV1                 | 1ASJ | 880                                   | 19         |                 |                |
|               | PV3                 | 1PVC | 878                                   | 17         |                 |                |
| Enterovirus D | EV-D70 <sup>c</sup> | -    | 866                                   | 17         |                 |                |
|               | EV-D68 <sup>d</sup> | 4WM8 | 860                                   | 26         |                 |                |
| Rhinovirus A  | RV-A16              | 1AYM | 852                                   | 26         | 25              | Labile         |
|               | RV-A2               | 1FPN | 855                                   | 25         |                 |                |
| Rhinovirus B  | RV-B3               | 1RHI | 854                                   | 23         |                 |                |
|               | RV-B14              | 4RHV | 855                                   | 24         |                 |                |
| Rhinovirus C  | RV-C15              | 5K0U | 841                                   | 27         |                 |                |

243 <sup>a</sup>  $P < 0.0001$  by unpaired Student's *t*-test. The extra histidine residues in acid sensitive EVs are primarily found in  
 244 VP1 and VP2.

245 <sup>b</sup> Total number of amino acids in capsid proteins including VP1, VP2, VP3, and VP4.

246 <sup>c</sup> Like EV-D70, EV-D94 is also acid resistant and contains 16 histidines.

247 <sup>d</sup> This refers to the Fermon strain. Strains MO and KY both contain 26 histidines.

248

249 **Table S11. Differences of amino acid sequences in capsid proteins among members of the**  
 250 **EV-D species.**

| Residue No. <sup>a</sup> | EV-D94 <sup>b</sup> | EV-D70 <sup>b</sup> | EV-D68 <sup>c</sup> | Occurrence of His <sup>d</sup> (%) | Location on virus                | 2nd most common residue <sup>d</sup> |
|--------------------------|---------------------|---------------------|---------------------|------------------------------------|----------------------------------|--------------------------------------|
| 1162                     | E                   | E                   | H                   | 100.0                              | Close to quasi-three-fold axis   |                                      |
| 1228                     | Y                   | Y                   | H                   | 100.0                              | Close to quasi-three-fold axis   |                                      |
| 1292                     | N                   | N                   | H                   | 99.6                               | Close to five-fold axis          |                                      |
| 2045                     | N                   | N                   | H                   | 99.6                               | Interior                         |                                      |
| 2098                     | Y                   | Y                   | H                   | 93.5                               | Near two-fold axis               | Y (6.5%)                             |
| 2135                     | Y                   | K                   | H <sup>e</sup>      | 81.0                               | At junction of VPs in a protomer | Y (19.0%)                            |
| 2244                     | N                   | N                   | H                   | 100.0                              | Near two-fold axis               |                                      |
| 3238                     | Q                   | I                   | H                   | 99.8                               | At junction of VPs in a protomer |                                      |
| 3240                     | E                   | P                   | H                   | 84.7                               | At junction of VPs in a protomer | D (15.1%)                            |
| 4023                     | N                   | S                   | H                   | 100.0                              | Interior                         |                                      |

251 <sup>a</sup> Numbering based on the amino acid sequence of EV-D68 strain MO.  
 252 <sup>b</sup> GenBank accession numbers are ABL61316.1 and ABA43708.1 for EV-D94 and EV-D70. They share about 76%  
 253 amino acid sequence identity with EV-D68 strain MO in the capsid region.  
 254 <sup>c</sup> Strains MO and KY possess the same set of ten histidines shown here. Strain Fermon has one exception which is a  
 255 Tyr at position 2098.  
 256 <sup>d</sup> Among 469 EV-D68 strains for which a complete or nearly complete genome sequence is available in GenBank.  
 257 <sup>e</sup> In close proximity to the conserved His2157.

258  
 259  
 260  
 261  
 262  
 263  
 264  
 265  
 266  
 267  
 268

269 **Supplementary References**

270  
 271 81. Rossmann MG, Blow DM (1962) The detection of sub-units within the crystallographic  
 272 asymmetric unit. *Acta Crystallogr* 15:24-31.  
 273 82. Cavanagh D, Rowlands D, Brown F (1978) Early events in the interaction between foot-  
 274 and-mouth disease virus and primary pig kidney cells. *J Gen Virol* 41(2):255-264.  
 275
